# Supplementary material for: Oxycodone self-administration activates the mitogen-activated protein kinase/ mitogen- and stress-activated protein kinase (MAPK-MSK) signaling pathway in the rat dorsal striatum
Source: PubMed Central journal article supplement (PMC7843984; doi:10.1038/s41598-021-82206-3), 2021-01-28
Supplement: 41598_2021_82206_MOESM1_ESM.pdf [file 41598_2021_82206_MOESM1_ESM.pdf]

## **Supplementary Information**

**Oxycodone self-administration activates the mitogen-activated protein kinase/  
mitogen- and stress-activated protein kinase (MAPK-MSK) signaling pathway in  
the rat dorsal striatum**

Christopher A. Blackwood, Michael T. McCoy, Bruce Ladenheim, and Jean Lud Cadet

**Supplementary Figure S1. Effects of oxycodone SA on PKC phosphorylation. (A)** Images of western blot and **(B, C)** quantification of PKC and pPKC. **(B)** PKC protein levels were not significantly affected in any group. **(C)** pPKC abundance is increased in only LgA-H rats. **(D)** pPKC/PKC ratios are increased in only the LgA-H rats. **(E)** pPKC/PKC ratios correlate with amount of oxycodone taken during the experiment (n=5-6 Sal; n=6 ShA; n=5 LgA-L; n=6 LgA-H). Key to statistics: \*, \*\* =  $p < 0.05, 0.01$ , respectively, in comparison to Sal rats; #, ## =  $p < 0.05, 0.01$ , respectively, in comparison to ShA rats; \$ =  $p < 0.05$  in comparison to LgA-L rats. Statistical analyses were performed by one-way ANOVA followed by Bonferroni or Fisher's PLSD post hoc test. The correlation coefficients and p values are shown on the graph.

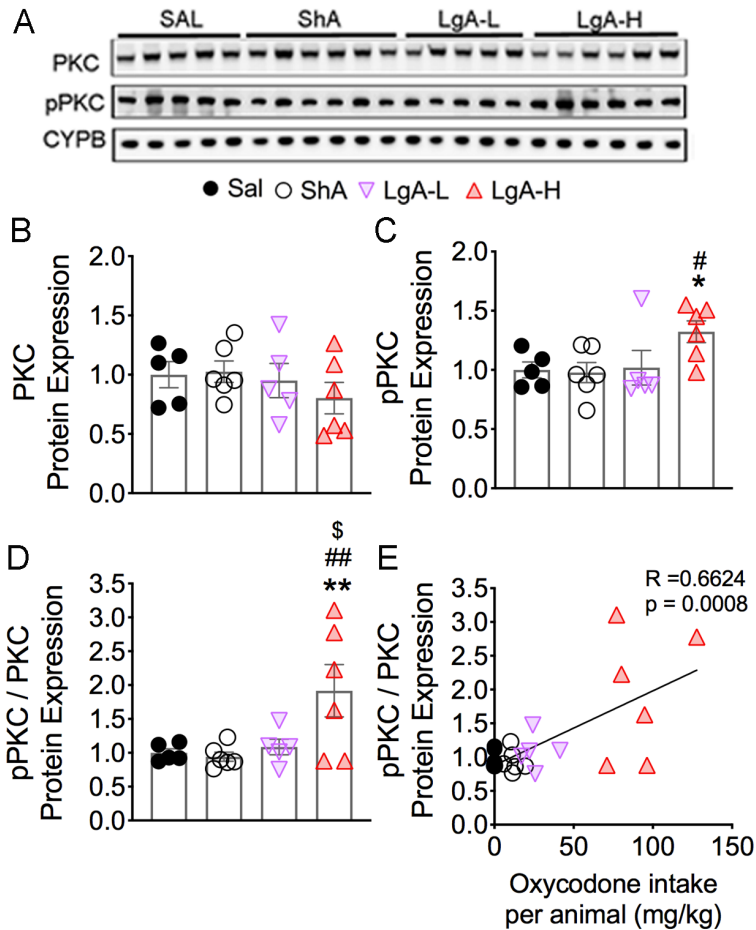

**Supplementary Figure S2. Exposure to oxycodone SA shows no changes in PKA.**

(A) Images of western blot and quantification of (B) PKA and (C) pPKA protein expression. Protein levels of (B-D) PKA, pPKA, and pPKA / PKA ratios show no significant changes. Similarly, (E) ratio of pPKA / PKA showed no correlation to the amount of oxycodone taken (n=6 Sal; n=6 ShA; n=6 LgA-L; n=6 LgA-H). Full-length blots are presented in Supplementary Figure S5. Statistical analyses were performed by one-way ANOVA followed by Bonferroni or Fisher's PLSD post hoc test. The correlation coefficients and p values are shown on the graph.

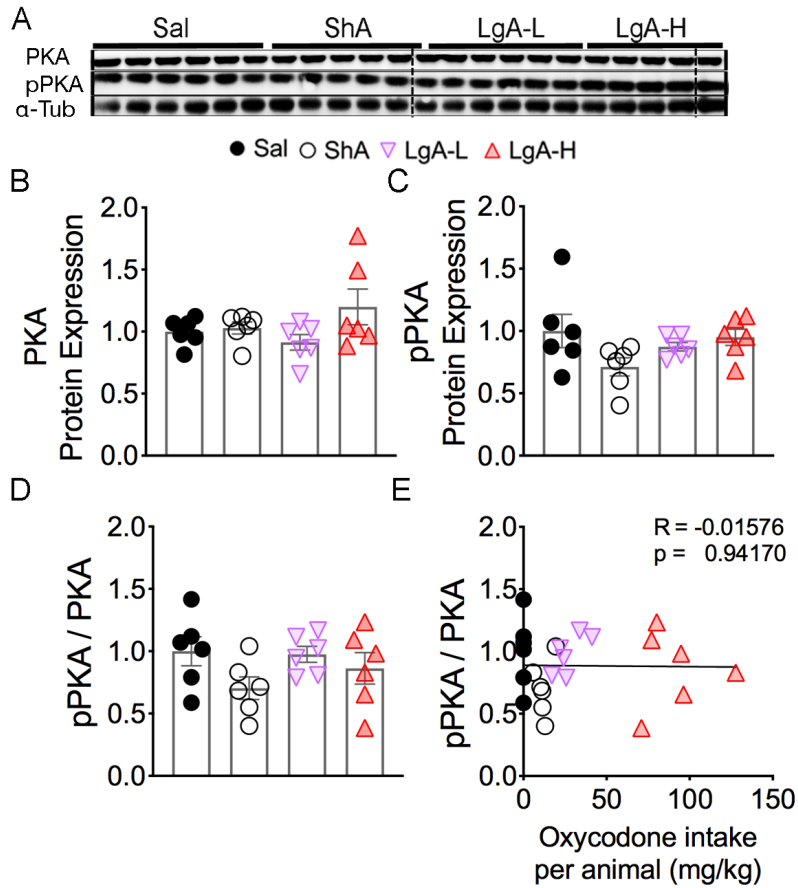

**Supplementary Figure S3. Exposure to oxycodone SA increases Tip60.** (A) Images of western blot and (B) quantification of Tip60 protein levels show increases in all drug groups (n=5 Sal; n=6 ShA; n=6 LgA-L; n=6 LgA-H). Key to statistics: \*, \*\*= p < 0.05, 0.01, respectively, in comparison to Sal rats. Stats were performed by one-way ANOVA followed by Bonferroni or Fisher's PLSD post hoc test.

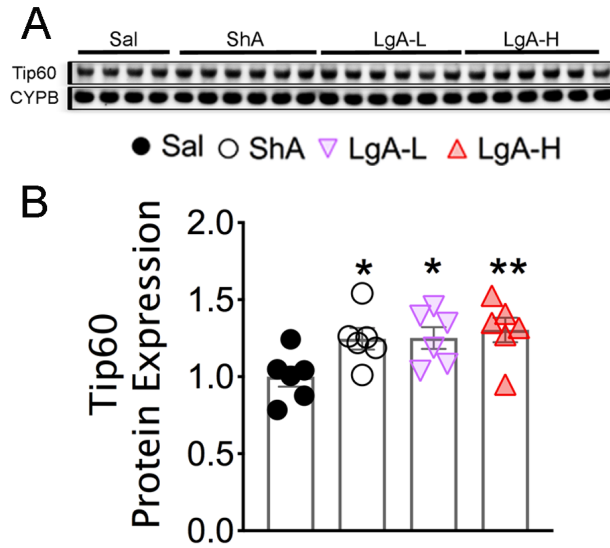



**Supplementary Figure S4. mRNA expression on the members of Ncoa family after exposure to oxycodone SA and early withdrawal.** The mRNA levels of (A) *Ncoa1*, (B) *Ncoa2*, and (C) *Ncoa3* show significant increases in the LgA-H group. The mRNA levels of *Ncoa1*, *Ncoa2*, and *Ncoa3* show a positive correlation with (D-F) pMSK1, (G-I) pMSK2, and (J-L) H3S10pK14Ac. However, the mRNA expression of *Ncoa1*, *Ncoa2*, and *Ncoa3* shows no correlation (M-O) CBP protein expression (n=4-9 Sal; n=5-9 ShA; n=4-8 LgA-L; n=5-9 LgA-H). Key to statistics: \*\*, \*\*\* = p < 0.01, 0.001, respectively, in comparison to Sal rats; #, ### = p < 0.05, 0.001, respectively, in comparison to SHA rats; \$\$, \$\$\$ = p < 0.01, 0.001, respectively, in comparison to LgA-L rats. Statistical analyses are as described in Fig. 2.

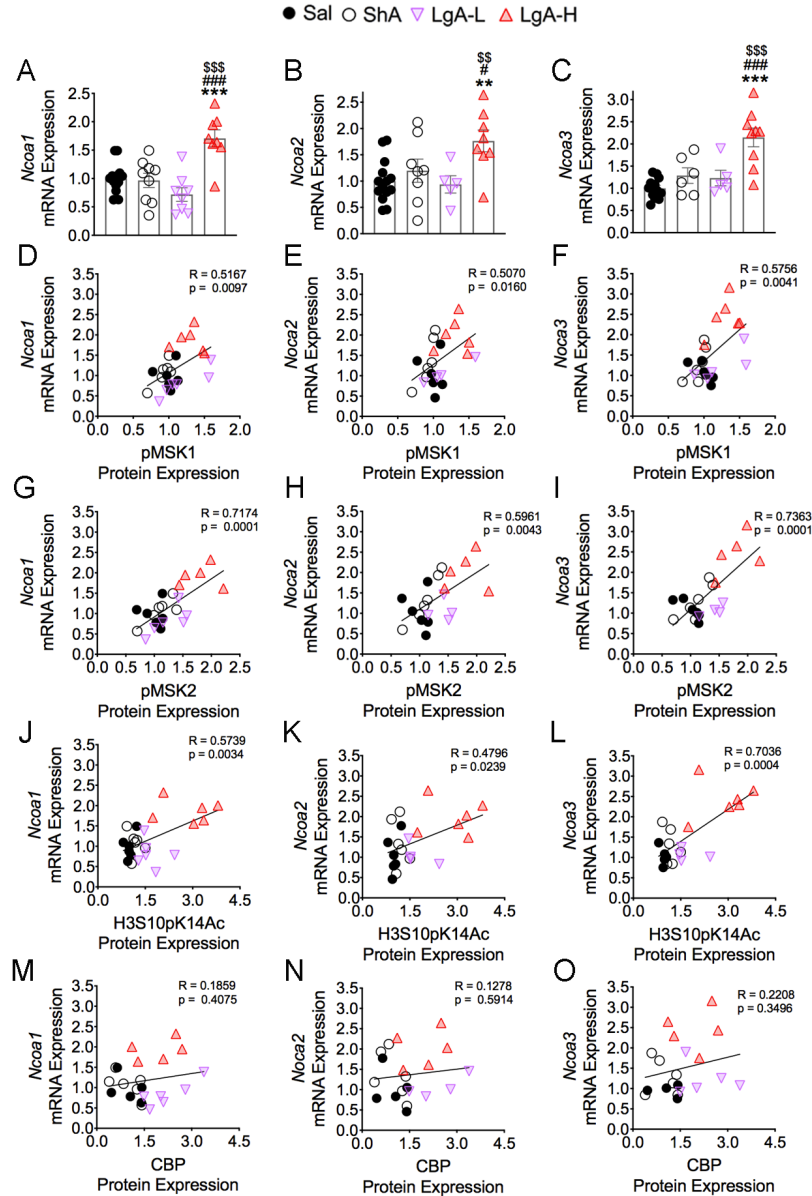

## Supplementary Figure S5: Full length blots images of

Figure S1: PKC, pPKC, CYPB

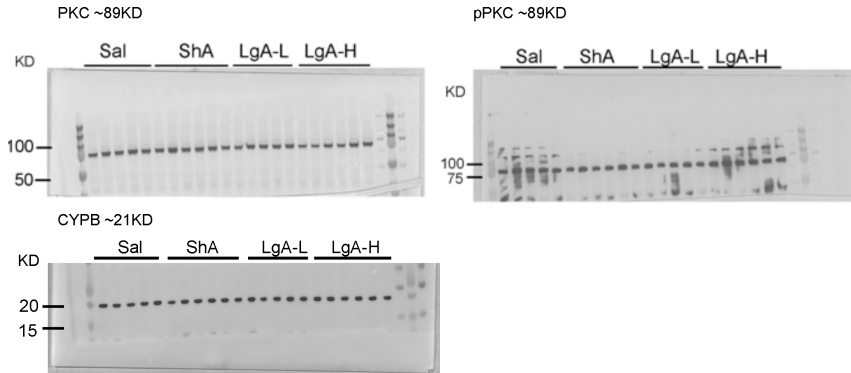

Figure S2: PKA, pPKA, Alpha-Tubulin

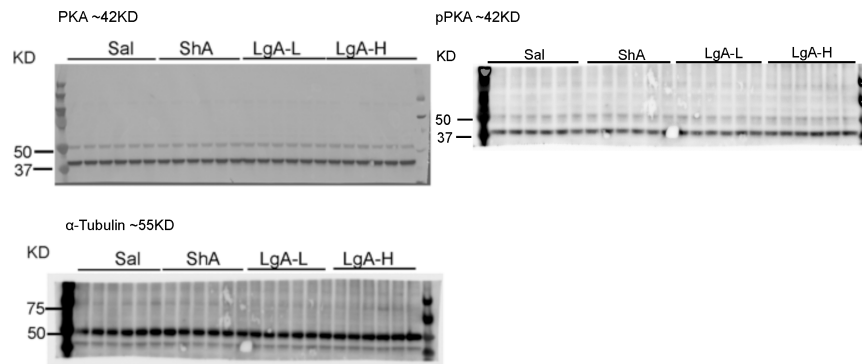

Figure 2: ERK1/2, pERK1/2, CYPB

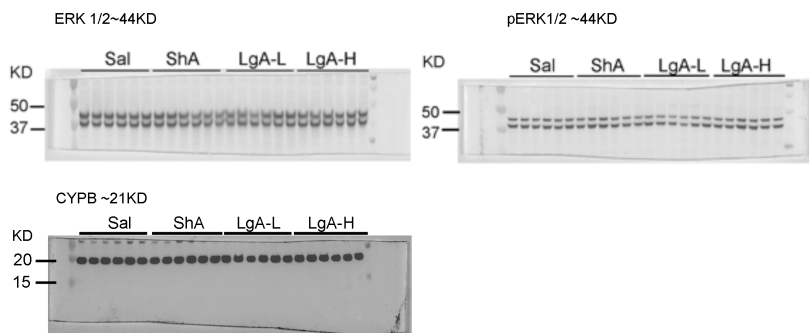

Figure 3: MSK1, pMSK1, MSK2, pMSK2, CYPB(s). Black arrow indicates bands of interest.

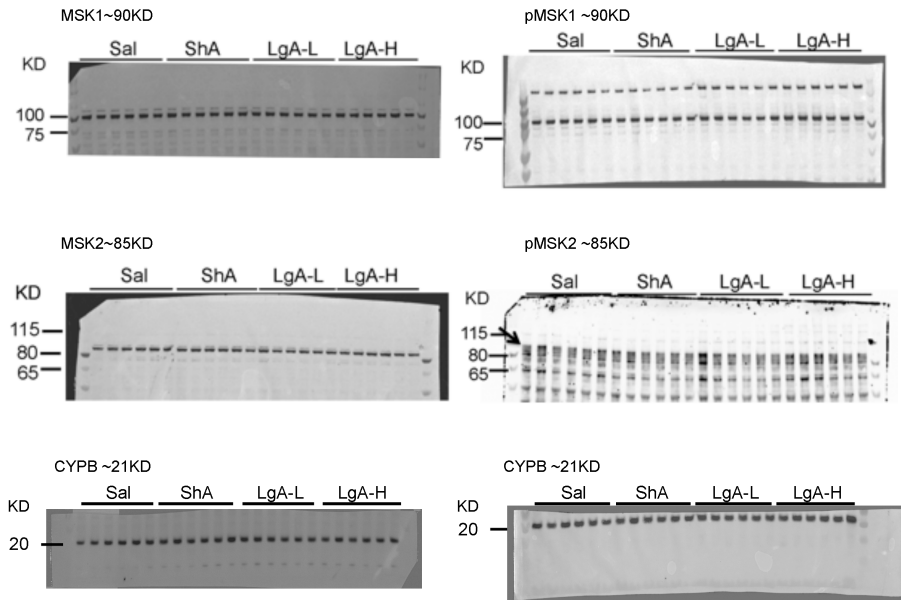

Figure 4: CREB, pCREB, CYPB(s). Black arrow indicates bands of interest.

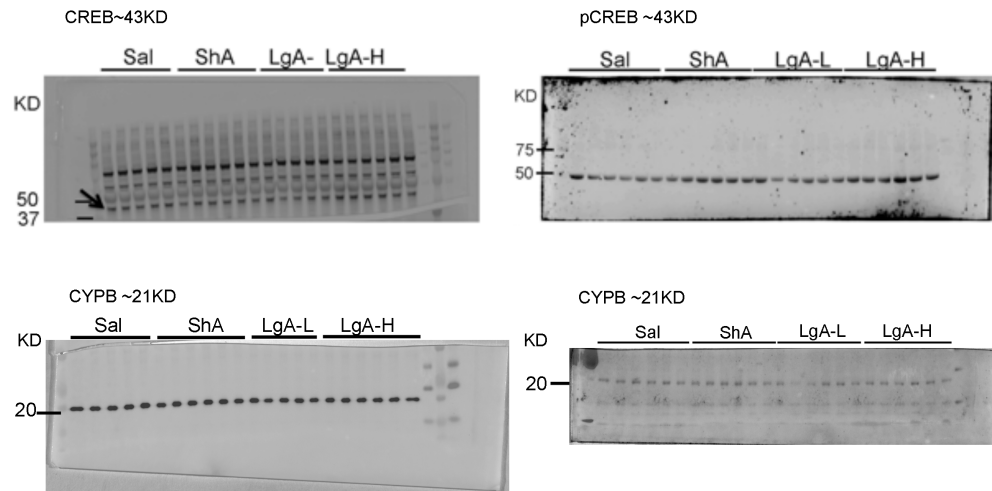

Figure 5: H3, H3S10pK14Ac, CYPB. Black arrow indicates bands of interest.

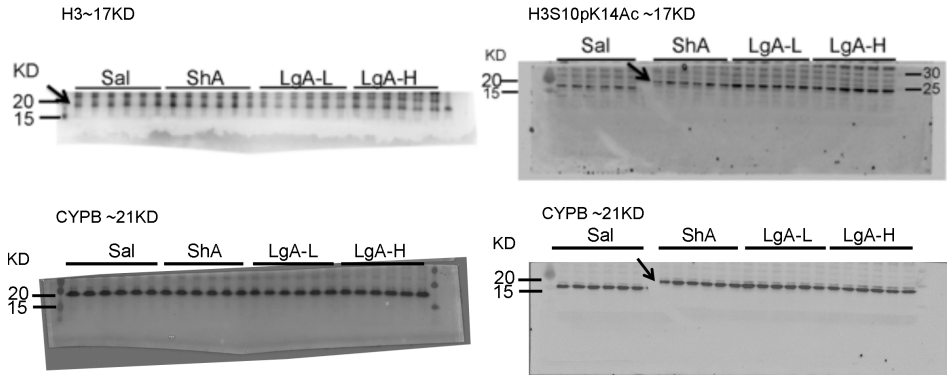

Figure 6: CBP, H3K27Ac, CYPB, alpha-Tubulin

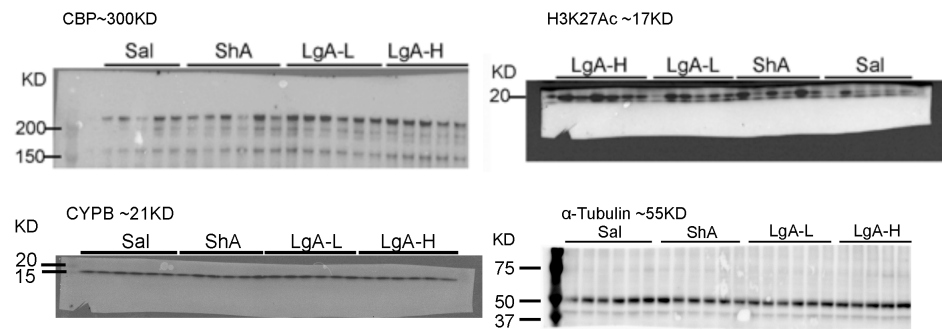

Figure S3: Tip60, CYPB

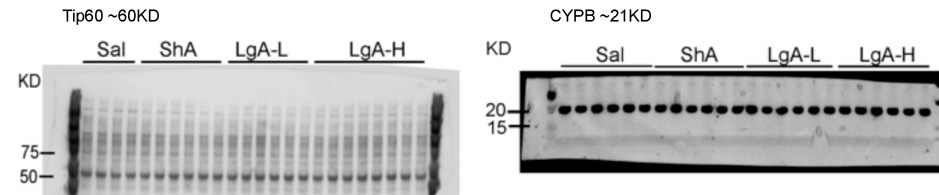

**Supplementary Table S1. Antibody list**

| <b>Symbol</b> | <b>Source</b> | <b>Dilution</b> | <b>Catalog #</b> | <b>RRID</b> | <b>Company</b>                         |
|---------------|---------------|-----------------|------------------|-------------|----------------------------------------|
| PKC           | Rabbit        | 1:1,000         | 2056             | AB2284227   | Cell Signaling, Danvers, MA, USA       |
| pPKC          | Mouse         | 1:1,000         | SC-377565        | AB10611031  | Santa Cruz Bio. Tech., Dallas, TX, USA |
| ERK1/2        | Rabbit        | 1:1,000         | 06-182           | AB310068    | Sigma-Aldrich, St. Louis, MO, USA      |
| pERK1/2       | Rabbit        | 1:1,000         | 4370             | AB2315112   | Cell Signaling, Danvers, MA, USA       |
| MSK1          | Rabbit        | 1:1,000         | 3489             | AB2285349   | Cell Signaling, Danvers, MA, USA       |
| pMSK1         | Rabbit        | 1:1,000         | 9595             | AB2181783   | Cell Signaling, Danvers, MA, USA       |
| MSK2          | Rabbit        | 1:10,000        | 3679             | AB2181641   | Cell Signaling, Danvers, MA, USA       |
| pMSK2         | Rabbit        | 1:10,000        | SAB4504629       | AB11184854  | Sigma-Aldrich, St. Louis, MO, USA      |
| CREB          | Rabbit        | 1:1,000         | 9197             | AB331277    | Cell Signaling, Danvers, MA, USA       |
| pCREB         | Mouse         | 1:1,000         | 9196             | AB331275    | Cell Signaling, Danvers, MA, USA       |
| Histone H3    | Rabbit        | 1:10,000        | 06-755           | AB2118461   | Sigma-Aldrich, St. Louis, MO, USA      |
| H3S10pK14Ac   | Rabbit        | 1:1,000         | 07-081           | AB310366    | Sigma-Aldrich, St. Louis, MO, USA      |
| H3K27Ac       | Rabbit        | 1:1,000         | 39034            | AB2722569   | Active Motif, Carlsbad, CA, USA        |
| CBP           | Rabbit        | 1:500           | 7389             | aB2616020   | Cell Signaling, Danvers, MA, USA       |
| PKA           | Mouse         | 1:1,000         | 4782             | AB2170170   | Cell Signaling, Danvers, MA, USA       |
| pPKA          | Rabbit        | 1:1,000         | 5661             | AB10707163  | Cell Signaling, Danvers, MA, USA       |
| TIP60         | Rabbit        | 1:10,000        | MABE430          | AB2551948   | Sigma-Aldrich, St. Louis, MO, USA      |
| CYPB          | Rabbit        | 1:10,000        | ab16045          | AB443295    | Abcam, Cambridge, MA, USA              |
| Alpha-Tubulin | Mouse         | 1:25,000        | T6074            | AB477582    | Sigma-Aldrich, St. Louis, MO, USA      |
| HRP (rabbit)  | Goat          | 1:5,000         | 7074             | AB2099233   | Cell Signaling, Danvers, MA, USA       |
| HRP (mouse)   | Horse         | 1:5,000         | 7076             | AB330924    | Cell Signaling, Danvers, MA, USA       |

**Supplementary Table S2.** List of RT-qPCR primers

| <b>Gene Name</b> | <b>Forward</b>                    | <b>Reverse</b>                    |
|------------------|-----------------------------------|-----------------------------------|
| <i>Aldh1a7</i>   | CTT GGA TAG TGC TGT TGA GTT T     | TTT CCT AGA ACG TAT TTC TTA GCC C |
| <i>Angp14</i>    | AGC AAC TGT TCC AGA AGG           | CAA TGA GCT GGG CCA TC            |
| <i>Brd2</i>      | CTC ATG TTC TCC AAC TGC TAT AA    | CAA GGC AGT AGA GAC AGG TA        |
| <i>Brd3</i>      | CAC TCT GGA AAC ATC AGT TTG       | TAA ACA TGG TGT TGA AGT CCT       |
| <i>Cacna2d3</i>  | GAT GAA TGG TCC TAC TGC AAC A     | TCC AAT AGG CTT CGA TAG GG        |
| <i>Dio2</i>      | CTT GCT GAT CAC TCT TCA GAT T     | TTA ACC TGT TTG TAG GCG TC        |
| <i>Dusp14</i>    | GGA TCC TTC GAA CGC TAG CTC       | TCC TGG ACG TAC TCG CAA AC        |
| <i>GluA1</i>     | GGC AAA TAC GCC TAC C             | ACT CGA TTA AGG CAA CC            |
| <i>GluA2</i>     | TCC TAC ACG GCT AAC TT            | GCT CGA TGT ACT CGT TC            |
| <i>Itpka</i>     | GTA GTA CAT TAG GAG CTG GC        | GTA CAA TTC TGG ATC GGG AC        |
| <i>Kcnc4</i>     | CCT AAG ACA TGG TCA GGA AT        | GTG GTA CAT GCT TCT TTC GTT       |
| <i>Kcng1</i>     | TGT TCC CAA ATG TGC CAC AA        | CAG CAG TGT GAC GTA GTA AG        |
| <i>Ncoa1</i>     | GGT ACT TGT CCC TCT TCC CA        | GTC CAG ACA CTG ACA TAG CA        |
| <i>Ncoa2</i>     | AGG AAG AAC TGA TGA ACA AGA G     | CAT CCG ACA GTT GAA GGT ATG       |
| <i>Ncoa3</i>     | TGT ATC GTT TCT CAT TGG CTG       | GAT TCG GGT TTG GTC TAC AT        |
| <i>Nos1</i>      | CCC AAG TTC GAC TGG TTT AAG       | GTA TCG AGA GTT GTC ACA GTA G     |
| <i>Pdgfd</i>     | CAA GGA TAA CTT CAA GAA CAA ACC A | AGA ACT TGT GAC TGA TTC CC        |
| <i>Pdgfrl</i>    | CGG AAC AGA CAT TGT GTA CG        | CGC TGG GAA CCT CTA CAT AA        |
| <i>Pdk4</i>      | GAT TAC TGA CCG CCT CTT TAG       | ATG GAA TAG AGA TTC AGA TCT CCT   |
| <i>Prph</i>      | AGG TTA GAA GAA GAA ACT CGC       | GTA GCT TCT TGA GGA ACT CAA T     |
| <i>Rtp2</i>      | GGA ACC AGA GCC TTA GGT TA        | GCC ACC TCC ATC TTC TCA TA        |
| <i>Wnt4</i>      | CAG TGG AGA TCT GGA GAA GT        | GTT GTT GTG AAG GTT CAT GAG T     |
